1 **The prognostic, predictive and clinicopathological impact of KRT81 / HNF1A- and**  
2 **GATA6- based transcriptional subtyping in pancreatic cancer**

3 Michael Guenther <sup>1,2</sup>, Sai Agash Surendran <sup>1</sup>, Volker Heinemann <sup>3</sup>, Michael Haas <sup>3,4</sup>, Stefan  
4 Boeck <sup>3,4</sup> and Steffen Ormanns <sup>1,2\*</sup>

5  
6 1: Innpath Institute of Pathology, Tirol Kliniken, Innsbruck, Austria

7 2: Institute of Pathology, Faculty of Medicine, Ludwig-Maximilians-University, Munich,  
8 Germany

9 3: Department of Internal Medicine III, Grosshadern University Hospital, Ludwig-Maximilians-  
10 University, Munich, Germany

11 4: Department of Hematology and Oncology, München Klinik Neuperlach, Munich, Germany

12 \*: corresponding author

13  
14 Figures: 3  
15 Tables: 3  
16 Supplementals: 6 figures, 12 tables  
17 References: 34  
18 Word count  
19 Abstract: 175  
20 Article: 2745

21  
22 Correspondence:

23 Steffen Ormanns, MD (ORCID 0000-0002-0754-9034)

24 Innpath Institute of Pathology – Tirol Kliniken

25 Anichstraße 35

26 6020 Innsbruck

27 Austria

28 [steffen.ormanns@innpath.at](mailto:steffen.ormanns@innpath.at)

1 **ABSTRACT**

2

3 **BACKGROUND**

4 Transcriptional subtypes of pancreatic ductal adenocarcinoma (PDAC) have prognostic  
5 implications and potential predictive functions. This study aimed to determine their  
6 clinicopathological impact in large cohorts of advanced and resected PDAC and their  
7 evolution during disease progression.

8

9 **METHODS**

10 The clinicopathological and prognostic implications of transcriptional subtypes determined by  
11 the expression of KRT81, HNF1A and GATA6 were examined using immunohistochemistry  
12 in advanced (n=139) and resected (n=411) PDAC samples as well as in 57 matched primary  
13 tumors and corresponding metastases. RNAseq data of 316 resected PDAC patients was  
14 analyzed for validation.

15

16 **RESULTS**

17 Both subtyping systems were highly interrelated. Subtypes switched during disease  
18 progression in up to 31.6% of patients. Transcriptional subtyping had a modest prognostic  
19 impact in both unstratified cohorts, but strongly improved outcomes in patients with KRT81  
20 positive / GATA6 negative tumors treated with palliative or adjuvant gemcitabine-based  
21 chemotherapy. RNAseq expression data confirmed the findings.

22

23 **CONCLUSIONS**

24 Transcriptional subtypes have differential responses on palliative and adjuvant gemcitabine-  
25 based chemotherapy, but they may change during disease progression. Both employed  
26 subtyping systems are equivalent and can be used to inform clinical therapy decisions.

27

28 **CLINICAL TRIAL REGISTRY**

29 The clinical trial registry identifier is NCT00440167.

30

31

32

33

34

35

36

37

1 **INTRODUCTION**

2 Although modest improvements in the prognosis of pancreatic ductal adenocarcinoma  
3 (PDAC) patients were achieved in the past years, mainly through innovative randomized  
4 control trials (RCT) on novel chemotherapy (CTX) regimens, the survival probability of the  
5 average PDAC patients remains desperately low <sup>1</sup>, even for patients in early disease stages<sup>2</sup>.  
6 For the minority of patients diagnosed with resectable disease, adjuvant therapy has become  
7 standard of care, with the active but toxic regimen FOLFIRINOX as 1<sup>st</sup> choice for the clinically  
8 fit patient and the less active but less toxic gemcitabine for the less fit<sup>3</sup>. Large sequencing  
9 studies have revealed the molecular background of the disease on the genetic as well as the  
10 transcriptional level, which resulted in the identification of transcriptional subtypes, based on  
11 the expression of specific hallmark genes<sup>4</sup>. Thus, several transcriptional subtyping systems  
12 were proposed, each of which showed a differential prognostic impact of the subtypes  
13 identified<sup>4</sup>. Some studies even proposed prognostic implications of transcriptional subtyping,  
14 which largely relied on complex, RNA-based methodologies such as RNA-sequencing  
15 (RNAseq), which are hard to establish in routine diagnostics. Therefore, efforts were made to  
16 break down complex subtyping systems to simpler approaches applicable in routine clinical  
17 practice by detecting the expression of each subtypes' hallmark genes through  
18 immunohistochemistry (IHC)<sup>5,6</sup>. Although these approaches resulted in valuable information  
19 on the potential clinical implications of the subtypes identified, their meaning to inform clinical  
20 decision making was modest at best<sup>6,7</sup>. Moreover, most studies did not examine the clinical  
21 significance of transcriptional subtypes with respect to clinicopathological parameters such  
22 as disease stage or the therapies applied -specifically in the adjuvant setting- and no study to  
23 date compared the different subtyping systems with each other in the same set of samples.  
24 Thus, in the present study, we examined the prognostic and potentially predictive impact of  
25 the two most employed IHC-based subtyping systems, i.e. the expression of KRT81 and  
26 HNF1A or GATA6 respectively, in large cohorts of advanced PDAC and resected PDAC  
27 patients, compared both subtyping systems and determined how the metastatic process may  
28 affect the predominant subtype.

29  
30 **MATERIALS and METHODS**

31 The study cohorts and the inclusion and exclusion criteria were described previously<sup>8</sup>.  
32 Archival formalin-fixed paraffin embedded (FFPE) histologically confirmed tumor tissue of  
33 primary tumors and metastatic tissue was collected from the pathology laboratories where  
34 the diagnosis of PDAC was first established. Patients' overall survival (OS), disease free  
35 survival (DFS) as well as progression free survival (PFS) was calculated as described  
36 before<sup>8</sup>. Written informed consent for the use of tumor material and clinical data was  
37 obtained from advanced PDAC patients upon study enrollment or before palliative

1 chemotherapy initiation. The ethics committee of the medical faculty LMU approved the use  
2 of patient material and data in the resected PDAC cohort (project 20-081). Tissue microarray  
3 (TMA) construction was described before<sup>8</sup>. GATA6 expression was detected on four µm thick  
4 sections by immunohistochemistry using an anti-GATA6 polyclonal rabbit antibody (PA1-104,  
5 Thermo Fisher, Germering, Germany) at a 1:200 dilution. Immunohistochemical detection of  
6 KRT81 and HNF1A was performed as described previously<sup>9</sup>. Appropriate positive controls  
7 were included in each staining run (human normal tonsil for KRT81, duodenal mucosa for  
8 HNF1A and normal exocrine pancreas for GATA6, suppl. figure S1 A - C). The expression  
9 pattern and expression strength were independently evaluated by two pathologists (MG, SO)  
10 blinded to the patient outcome and discrepant cases were discussed until agreement was  
11 reached. Tumors were classified as follows: samples with ≥ 30% KRT81- or HNF1A-positive  
12 tumor cells were considered positive for each marker. For GATA6 expression, tumors with  
13 distinct nuclear staining were considered GATA6 positive. Microphotographs were acquired  
14 as described previously<sup>8</sup>. Kaplan-Meier curves, Cox regression analyses and cross  
15 tabulations were computed using SPSS software (IBM, Ehningen, Germany), considering a  
16 p-value of ≤ 0.05 as statistically significant. Propensity score matching, as well as the  
17 analysis of publicly available gene expression data and the patients' corresponding clinical  
18 data was carried out as described before<sup>8</sup>. RNA sequencing data and clinical information of  
19 the ICGC-CA cohort were downloaded from International Cancer Genome Consortium  
20 (ICGC) data portal<sup>10</sup>. Genomic analysis and data visualization was conducted using  
21 cBioPortal for Cancer Genomics<sup>11</sup>.

22

## 23 **RESULTS**

### 24 **Transcriptional subtypes according to the expression of KRT81, HNF1A and GATA6** 25 **widely overlap but may change during metastatic progression**

26 Of the 139 samples in the advanced PDAC (aPDAC) cohort, 36.0% (n=50) were KRT81+,  
27 36.0% (n=50) were double negative and 28.0% (n=39) were HNF1A+, whereas 60.4%  
28 (n=84) were GATA6- and 39.6% (n=55) were positive for GATA6. In the resected PDAC  
29 (rPDAC) cohort, 39.9% (n=164) were KRT81+, 43.6% (n=179) were double negative and  
30 16.5% (n=68) were HNF1A+, whereas 41.1% (n=169) displayed GATA6 expression and  
31 58.9% (n=242) were GATA6- (figure 1A). Tumors displaying expression of both KRT81 and  
32 HNF1A (double positive), which was the case in 16.5% of the samples in the aPDAC cohort  
33 and 7.1% in the rPDAC cohort, were categorized according to the marker showing a  
34 predominant expression pattern. This approach was backed by highly similar prognostic  
35 implications of the thus assessed subtypes in the double positive cases compared to the  
36 single positive ones (suppl. table S1). Both subtyping systems overlapped widely in both  
37 cohorts ( $\chi^2$  p<0.001 each), with the HNF1A+ subtype being mostly GATA6+ (suppl. table

1 S2). However, a significant proportion of KRT81+ samples displayed GATA6 expression in  
2 both cohorts and no clear trend towards a GATA6-based subtype was observed for the  
3 double negative samples, which were rather GATA6- in the aPDAC cohort and rather  
4 GATA6+ in the rPDAC cohort (figure 1B and C). For both systems, the assessment of each  
5 tumors subtype remained remarkably stable when several tumor tissue punches from  
6 different FFPE blocks were compared separately (suppl. table S3).

7 To assess how metastatic progression may affect the tumors subtype, we examined to which  
8 extent the primary tumors' and the metastatic tissues' subtypes were interrelated in  
9 synchronous and metachronous metastases to its corresponding primary in 57 cases. There  
10 was a strong correlation between the primaries' and the metastases' subtype ( $p=0.001$ ), but  
11 we observed a subtype switch according to KRT81 / HNF1A expression in 18 cases (31.6%).  
12 This was not associated to synchronous or metachronous metastasis (suppl. table S4) but  
13 came with a highly significant trend towards a prognostically more favorable subtype (suppl.  
14 Table S5). More than half ( $n=28$ ) of the  $n=41$  KRT81+ cases remained KRT81+ in their  
15 corresponding metastasis, the rest was mostly double negative and only three cases  
16 switched to HNF1A+. Double negative cases mostly remained double negative during  
17 metastasis, whereas the few ( $n=3$ ) HNF1A+ cases split between KRT81 positivity and  
18 HNF1A positivity in their metastatic tissue (figure 1 D, suppl. table S6). In contrast, the  
19 transcriptional subtype according to GATA6 expression remained stable in most cases with 9  
20 of 34 cases switching from GATA6- to GATA6+ and 7 of 23 cases switching from GATA6+ to  
21 GATA6- (figure 1 E, suppl. table S6). Here, subtype switching occurred more frequently in  
22 synchronous metastases (suppl. table S4). Neither the primary tumors' nor the metastases  
23 'subtype or the occurrence of a subtype switch was associated with metastasis localization  
24 (suppl. table S7).

25

## 26 **Transcriptional subtypes affect patient outcome dependent on palliative therapy in** 27 **advanced PDAC patients**

28 The baseline characteristics, outcome and clinicopathological variables of the aPDAC patient  
29 cohort were previously described<sup>8</sup>. In the unstratified cohort, transcriptional subtypes  
30 according to KRT81/HNF1A expression implied a statistically non-significant trend for patient  
31 OS, with HNF1A+ cases having the best, double negative cases an intermediate and  
32 KRT81+ the worst outcome (OS 6.8 vs. 9.1 vs. 10.7 months,  $p=0.08$ , HR=1.27 95% CI 1.02  
33 – 1.59, suppl. figure S2 A), which was not reflected in PFS times (PFS 3.6 vs. 4.1 vs. 6.4  
34 months,  $p=0.42$ , HR=1.16 95% CI 0.91 – 1.48, suppl. figure S2 B). Similarly, subtyping  
35 based on GATA6 expression had no prognostic impact in the unstratified patient cohort (PFS  
36 4.2 vs 4.3 months,  $p=0.43$ , HR 1.16 95%CI 0.80 – 1.69; OS 7.8 vs. 9.2 months,  $p=0.76$ , HR  
37 1.06, 95% CI 0.74 – 1.51, suppl. figure S2 C, D). As expected, only KRT81/ HNF1A based

1 subtypes showed a trend towards statistical significance in multivariate analyses ( $p=0.07$ ,  
2 suppl. table S8) and transcriptional subtypes were not associated with the patients'  
3 clinicopathological variables (table 1). Stratification of patient subgroups according to the  
4 applied type of 1<sup>st</sup> line palliative treatment, revealed a significant impact of the tumors  
5 transcriptional subtype on patient outcome, as patients with double negative tumors derived  
6 the most benefit from palliative gemcitabine-based chemotherapy (pGC) compared to  
7 palliative non-gemcitabine-based chemotherapy (pnGC, PFS 6.3 vs 2.4 months,  $p<0.001$ ,  
8 HR 0.26, 95%CI 0.13 – 0.52; OS 9.6 vs 5.7 months,  $p=0.04$ , HR 0.53, 95%CI 0.29 – 0.97,  
9 figure 2 A,B). Similarly, patients with KRT81+ tumors showed favorable PFS times with pGC  
10 compared to pnGC (PFS 4.5 vs. 2.2 months,  $p=0.02$ , HR 0.43, 95%CI 0.21 – 0.90 figure 2  
11 A), but no significant impact of palliative chemotherapy on OS times (OS 6.8 vs 4.7 months,  
12  $p=0.47$ , HR 0.78 95%CI 0.40 – 1.52, figure 2 B). Interestingly, the type of palliative  
13 chemotherapy had no significant prognostic impact in patients with HNF1A+ tumors (pnGC  
14 vs. pGC, PFS 6.6 vs. 2.7 months,  $p=0.28$ , HR 0.65 95%CI 0.30 – 1.42; OS 13.2 vs. 9.3  
15 months,  $p=0.60$ , HR 0.82, 95%CI 0.38 – 1.75 figure 2 A, B), which was also confirmed in  
16 multivariate analyses (suppl. table S9). Applying the GATA6-based subtypes paralleled these  
17 findings, as patients with GATA6- tumors profited from pGC compared to pnGC, whereas no  
18 significant prognostic impact of the type of palliative chemotherapy was detected for patients  
19 with GATA6+ tumors (GATA6- PFS 9.3 vs 2.4 months,  $p<0.001$ , HR 0.27, 95%CI 0.15 –  
20 0.48; OS 9.7 vs 7.2 months,  $p=0.04$ , HR 0.60, 95%CI 0.38 – 0.97; GATA6+ 5.0 vs 2.7  
21 months,  $p=0.21$ , HR 0.65 95%CI 0.33 – 1.29; OS 7.8 vs 4.9 months,  $p=0.34$ , HR 0.72 95%CI  
22 0.37 – 1.42, figure 2 C,D), which was confirmed for PFS in multivariate analyses (suppl. table  
23 S9).

24

### 25 **Transcriptional subtypes affect patient outcome dependent on adjuvant therapy in** 26 **resected PDAC patients**

27 In the unstratified rPDAC cohort, there was a statistically non-significant impact of the  
28 tumors' subtype on outcome, with KRT81 positivity conferring the worst, double negative an  
29 intermediate and HNF1A positivity the best outcome (OS 17.1 vs. 19.3 vs. 22.3 months,  
30  $p=0.34$ , HR 0.87, 95% CI 0.81 – 0.94; DFS 9.7 vs. 12.1 vs. 12.4 months,  $p=0.47$ , HR 1.08,  
31 95%CI:0.90 – 1.28, suppl. figure S3 A, B), which turned out as independent prognostic  
32 marker for OS in multivariate analyses (suppl. table S 10). Similarly, GATA6 expression was  
33 associated with a statistically not significant trend towards better prognosis (OS 20.7 vs. 15.2  
34 months,  $p=0.20$ , HR 0.87, 95% CI 0.69 – 1.08, suppl. figure S3 C) but showed no tendency  
35 for differences in DFS (suppl. figure S3 D) although it turned out as independent  
36 prognosticator for OS in multivariate analyses ( $p=0.006$ , HR 0.73, 95%CI 0.58 – 0.91, suppl.  
37 table S10). Transcriptional subtypes were not associated to the patients' clinicopathological

1 parameters (table 2). To test the impact of subtyping on response to adjuvant chemotherapy  
2 we calculated DFS and OS times in each subtype according to the application of adjuvant  
3 gemcitabine-based chemotherapy (aGC) compared to no or non-gemcitabine-based  
4 adjuvant chemotherapy (naGC). Interestingly, the prognostically worst KRT81+ subtype, had  
5 the strongest prognostic impact of adjuvant gemcitabine-based chemotherapy (DFS 5.0 vs.  
6 13.7 months,  $p < 0.001$ , HR 0.37, 95% CI 0.25 – 0.55; OS 8.3 vs. 31.6 months,  $p < 0.001$ , HR  
7 0.26 95%CI 0.18 – 0.37), whereas this was not the case for the double negative subtype  
8 (DFS 10.1 vs. 13.5 months,  $p = 0.52$ , HR 0.88, 95%CI 0.59 – 1.32; OS 17.7 vs. 21.0 months,  
9  $p = 0.08$ , HR 0.76, 95%CI 0.54 – 1.07) or the HNF1A+ subtype (DFS 12.8 vs. 9.5 months,  
10  $p = 0.39$ , HR 1.32, 95%CI 0.70 – 2.49; OS 20.4 vs. 23.4 months,  $p = 0.38$ , HR 0.78, 95%CI  
11 0.45 – 1.36, figure 3 A,B). Similar results were obtained for GATA6-based subtyping, where  
12 the GATA6- subtype profited significantly from adjuvant gemcitabine-based chemotherapy  
13 (DFS 4.8 vs. 15.1 months,  $p < 0.001$ , HR 0.30, 95%CI 0.19 – 0.46; OS 7.0 vs. 32.2 months,  
14  $p < 0.001$ , HR 0.21, 95%CI 0.66 – 1.18), whereas it was not beneficial in the GATA6+ subtype  
15 (DFS 10.5 vs. 10.0 months,  $p = 0.62$ , HR 1.09, 95%CI 0.78 – 1.51; OS 18.9 vs. 21.5 months,  
16  $p = 0.42$ , HR 0.87, 95%CI 0.66 – 1.18, figure 3 C,D). These findings were also reflected in 5-  
17 year-survival rates (suppl. table S11). We confirmed these findings in multivariate analyses  
18 which also demonstrated the prognostic impact of the patients' clinicopathological  
19 characteristics in each subtype. Interestingly, the R-status was most important for DFS and  
20 OS in the KRT81+ and GATA6- subtypes, whereas in the HNF1A+ and the GATA6+  
21 subtypes pN-stage had the strongest prognostic influence (suppl. table S11).

22 We validated these findings in two independent publicly available PDAC cohorts ( $n = 138$  and  
23  $n = 178$ ) with corresponding RNAseq-based gene expression data. In both datasets, just as in  
24 our cohort, patients with KRT81+ or GATA6- tumors derived the most benefit from  
25 gemcitabine-based adjuvant chemotherapy, whereas in the other subtypes the impact of  
26 aGC was minor (suppl. figure S4).

27 To explore a potential mechanistic background for the observed gemcitabine-resistance in  
28 the patients with HNF1A+ / GATA6+ tumors, we tested the association of the expression of  
29 HNF1A, KRT81 and GATA6 with the expression of gemcitabine-resistance associated genes  
30 in the same RNAseq-based gene expression datasets. In both cohorts, there was a strong  
31 positive correlation with HNF1A and GATA6 expression and an inverse correlation for KRT81  
32 with the expression of *ABCC3* and *MVP*, both known to cause gemcitabine-resistance *in vitro*  
33 and *in vivo*<sup>12,13</sup> (suppl. figure S5). Of note, after adjusting for multiple testing, transcriptional  
34 subtypes did not correlate with specific molecular alterations on the genomic level (suppl.  
35 figure S6).

36

37 **DISCUSSION**

1 Transcriptional subtyping in pancreatic cancer using different systems of hallmark genes and  
2 detection techniques and its potential clinical or biological impact has been reported several  
3 times to date <sup>5-7,9,14-25</sup> (table 3). There is a certain consensus that there are at least two  
4 subtypes, mostly termed “basal” or “quasi-mesenchymal” and “classical”<sup>26</sup>. Whereas the first  
5 one is often associated with poorer outcome and sometimes higher tumor grade, exemplified  
6 by the adenosquamous subtype of PDAC, the latter is associated with better prognosis and  
7 better therapy response to FOLFIRINOX (FFX)<sup>14,27</sup>. Other previously proposed transcriptional  
8 subtypes, such as the so called “immunogenic” or “ADEX” subtype by Bailey et al (QUOTE),  
9 could not be reproduced entirely by other groups <sup>28</sup>. Thus, their existence remains a matter of  
10 debate to date. None of the previously published studies on transcriptional subtyping in  
11 PDAC examined their predictive impact on currently still widely employed therapies.  
12 Moreover, none of the IHC-based subtyping systems were compared in the same set of  
13 patient samples as yet and a potential subtype switch during metastatic progression -which  
14 eventually occurs in the majority of PDAC patients- has not been examined either. In this  
15 study, we employed and compared the two most widespread subtyping systems based on  
16 the robust immunohistochemical detection of KRT81, HNF1A or GATA6. We show that both  
17 systems overlap widely and can be employed equally, which offers a cost efficient approach  
18 to personalized cancer therapy as specific subtypes respond differentially to therapy. For  
19 instance, patients with KRT81+ / GATA6- tumors profit better from gemcitabine-based  
20 chemotherapy in the palliative but also the adjuvant setting compared to their KRT81-/  
21 GATA+ counterparts in our cohorts, which is backed by previously published data <sup>6,29</sup>. Thus,  
22 transcriptional subtyping by IHC could be used to inform therapy decisions in the routine  
23 clinical setting, even in cases with scarce or low-quality tumor material in which RNA-based  
24 approaches tend to fail. Our approach to categorize according to the most dominant subtype  
25 in the KRT81/HNF1A system, resolved the issue of double positive cases, which were  
26 excluded from analysis in previously published studies <sup>5,7,22,23</sup>. Our novel finding that  
27 transcriptional subtypes may switch during metastatic progression may explain differential  
28 therapy responses of primary tumors and metastases and implies a rationale to re-biopsy  
29 metastatic tissue to inform a subtype-based therapy choice. We also show that the R-status  
30 has a much stronger prognostic impact in KRT81+ / GATA6- tumors. Thus, in this subtype, it  
31 is much more important to achieve a wide R0-resection compared to others, which should be  
32 considered during resection and may justify a more aggressive surgical approach.  
33 Its retrospective nature and the fact that no patients treated with more active regimens like  
34 FFX were included in the analyses are limitations of our study. However, not only in the  
35 adjuvant setting but also in advanced disease, most patients are still treated with  
36 gemcitabine-based chemotherapy regimens to date, as co-morbidities and frailty preclude  
37 the application of potentially more efficient but more toxic regimens like FFX <sup>30</sup>, which in real



1 world data not necessarily prove to be superior to gemcitabine-based regimens<sup>31,32</sup>. Thus, in  
2 the present study we propose a simple and robust diagnostic tool for therapeutic decision  
3 making in routine clinical practice. Physicians should be aware of a potential subtype switch  
4 during disease progression, which justifies a re-biopsy of metastatic lesions.

## 9 **ADDITIONAL INFORMATION**

### 10 **Ethics approval and consent to participate**

11 Each patient gave written informed consent for the use of its tumor material and clinical data  
12 for academic research purposes upon study enrollment. Ethical approval by the local ethics  
13 committee was given for each study<sup>33,34</sup> and they were carried out according to the  
14 Declaration of Helsinki. The non-commercial academic use of anonymized patient data and  
15 corresponding tumor material was approved by the ethics committee of the medical faculty of  
16 Ludwig-Maximilians-University without obtaining the patients' informed consent (project  
17 numbers 554-11, 401-15, 20-081, 23-0222 and 23-0224).

### 19 **Availability of data and materials**

20 The expression datasets used for validation are publicly accessible on

21 <https://portal.gdc.cancer.gov/> and <https://dcc.icgc.org/>.

22 Raw data on the patient cohorts employed in this study can be obtained from the  
23 corresponding author upon reasonable request.

### 25 **Competing interests**

26 All authors declare no conflict of interest related to the present study.

### 28 **Funding**

29 This study did not receive any funding.

### 31 **Author contributions**

32 MG and SO read and scored immunohistochemical stainings, performed statistical analyses,  
33 drafted figures and wrote the manuscript. SAS analyzed bioinformatic data and drafted  
34 figures. VH, MH and SB provided clinical patient data and /or patient material. All authors  
35 read and reviewed the manuscript.

### 37 **Acknowledgments**

1 We thank Andrea Sendelhofert and Anja Heier for excellent technical assistance and all  
2 study participants and their families for supporting our research.

#### 4 **References**

- 5 1 Park, W., Chawla, A. & O'Reilly, E. M. Pancreatic cancer: a review. *Jama* **326**, 851-  
6 862 (2021).
- 7 2 Guenther, M. *et al.* The impact of adjuvant therapy on outcome in UICC stage I  
8 pancreatic cancer. *International Journal of Cancer* **151**, 914-919 (2022).
- 9 3 Tempero, M. A. *et al.* Pancreatic adenocarcinoma, version 2.2021, NCCN clinical  
10 practice guidelines in oncology. *Journal of the National Comprehensive Cancer*  
11 *Network* **19**, 439-457 (2021).
- 12 4 Collisson, E. A., Bailey, P., Chang, D. K. & Biankin, A. V. Molecular subtypes of  
13 pancreatic cancer. *Nature reviews Gastroenterology & hepatology* **16**, 207-220  
14 (2019).
- 15 5 Noll, E. M. *et al.* CYP3A5 mediates basal and acquired therapy resistance in different  
16 subtypes of pancreatic ductal adenocarcinoma. *Nature medicine* **22**, 278-287 (2016).
- 17 6 Martinelli, P. *et al.* GATA6 regulates EMT and tumour dissemination, and is a marker  
18 of response to adjuvant chemotherapy in pancreatic cancer. *Gut* **66**, 1665 (2017).
- 19 7 Muckenhuber, A. *et al.* Pancreatic Ductal Adenocarcinoma Subtyping Using the  
20 Biomarkers Hepatocyte Nuclear Factor-1A and Cytokeratin-81 Correlates with  
21 Outcome and Treatment Response. *Clin Cancer Res* **24**, 351-359 (2018).
- 22 8 Guenther, M. *et al.* TPX2 expression as a negative predictor of gemcitabine efficacy  
23 in pancreatic cancer. *British Journal of Cancer*, 1-8 (2023).
- 24 9 Kruger, S. F. *et al.* Prognosis and tumor biology of pancreatic cancer patients with  
25 isolated lung metastases: translational results from the German multicenter AIO-  
26 YMO-PAK-0515 study. *ESMO Open* **7**, 100388 (2022).
- 27 10 Zhang, J. *et al.* The international cancer genome consortium data portal. *Nature*  
28 *biotechnology* **37**, 367-369 (2019).
- 29 11 Cerami, E. *et al.* The cBio cancer genomics portal: an open platform for exploring  
30 multidimensional cancer genomics data. *Cancer discovery* **2**, 401-404 (2012).
- 31 12 Zhao, Y. *et al.* ABCC3 as a marker for multidrug resistance in non-small cell lung  
32 cancer. *Scientific reports* **3**, 3120 (2013).
- 33 13 Yu, X. *et al.* CD73 induces gemcitabine resistance in pancreatic ductal  
34 adenocarcinoma: A promising target with non-canonical mechanisms. *Cancer Letters*  
35 **519**, 289-303 (2021).
- 36 14 O'Kane, G. M. *et al.* GATA6 Expression Distinguishes Classical and Basal-like  
37 Subtypes in Advanced Pancreatic Cancer. *Clin Cancer Res* **26**, 4901-4910 (2020).
- 38 15 Duan, K. *et al.* The value of GATA6 immunohistochemistry and computer-assisted  
39 diagnosis to predict clinical outcome in advanced pancreatic cancer. *Sci Rep* **11**,  
40 14951 (2021).
- 41 16 de Andrés, M. P. *et al.* GATA4 and GATA6 loss-of-expression is associated with  
42 extinction of the classical programme and poor outcome in pancreatic ductal  
43 adenocarcinoma. *Gut* (2022).
- 44 17 Beutel, A. K. *et al.* A Prospective Feasibility Trial to Challenge Patient-Derived  
45 Pancreatic Cancer Organoids in Predicting Treatment Response. *Cancers (Basel)* **13**  
46 (2021).
- 47 18 Shoucair, S. *et al.* GATA6 and Keratin5 Expression Profile is a Reliable Biomarker for  
48 Prediction of Improved Survival with Adjuvant Chemotherapy after Surgical Resection  
49 in PDAC. *HPB* **24**, S75 (2022).
- 50 19 Heredia-Soto, V. *et al.* The Relationship between the Expression of GATA4 and  
51 GATA6 with the Clinical Characteristics and Prognosis of Resectable Pancreatic  
52 Adenocarcinoma. *Biomedicines* **11**, 252 (2023).

- 1 20 Park, E. *et al.* Combined tumor epithelial and stromal histopathology with keratin 81  
2 expression predicts prognosis for pancreatic ductal adenocarcinoma. *J Hepatobiliary*  
3 *Pancreat Sci* **29**, 250-261 (2022).
- 4 21 Lu, Y. *et al.* HNF1A inhibition induces the resistance of pancreatic cancer cells to  
5 gemcitabine by targeting ABCB1. *EBioMedicine* **44**, 403-418 (2019).
- 6 22 Kaissis, G. *et al.* A machine learning algorithm predicts molecular subtypes in  
7 pancreatic ductal adenocarcinoma with differential response to gemcitabine-based  
8 versus FOLFIRINOX chemotherapy. *PloS one* **14**, e0218642 (2019).
- 9 23 Kaissis, G. A. *et al.* Multiparametric Modelling of Survival in Pancreatic Ductal  
10 Adenocarcinoma Using Clinical, Histomorphological, Genetic and Image-Derived  
11 Parameters. *Journal of Clinical Medicine* **9**, 1250 (2020).
- 12 24 Peng, L. *et al.* Urokinase-Type Plasminogen Activator Receptor (uPAR) Cooperates  
13 with Mutated KRAS in Regulating Cellular Plasticity and Gemcitabine Response in  
14 Pancreatic Adenocarcinomas. *Cancers* **15**, 1587 (2023).
- 15 25 de Andrés, M. P. *et al.* GATA4 and GATA6 loss-of-expression is associated with  
16 extinction of the classical programme and poor outcome in pancreatic ductal  
17 adenocarcinoma. *bioRxiv* (2021).
- 18 26 Singh, S., Hasselluhn, M. C. & Neesse, A. A tangled tale of molecular subtypes in  
19 pancreatic cancer. *Gut* **68**, 953-954 (2019).
- 20 27 Birnbaum, D. J., Finetti, P., Birnbaum, D., Mamessier, E. & Bertucci, F. Validation and  
21 comparison of the molecular classifications of pancreatic carcinomas. *Molecular*  
22 *cancer* **16**, 1-7 (2017).
- 23 28 Maurer, C. *et al.* Experimental microdissection enables functional harmonisation of  
24 pancreatic cancer subtypes. *Gut* **68**, 1034-1043 (2019).
- 25 29 Collisson, E. A. *et al.* Subtypes of pancreatic ductal adenocarcinoma and their  
26 differing responses to therapy. *Nat Med* **17**, 500-503 (2011).
- 27 30 Hegewisch-Becker, S. *et al.* Results from the prospective German TPK clinical cohort  
28 study: treatment algorithms and survival of 1,174 patients with locally advanced,  
29 inoperable, or metastatic pancreatic ductal adenocarcinoma. *International journal of*  
30 *cancer* **144**, 981-990 (2019).
- 31 31 Santucci, J. *et al.* Impact of first-line FOLFIRINOX versus Gemcitabine/Nab-Paclitaxel  
32 chemotherapy on survival in advanced pancreatic cancer: Evidence from the  
33 prospective international multicentre PURPLE pancreatic cancer registry. *European*  
34 *Journal of Cancer* **174**, 102-112 (2022).
- 35 32 Riedl, J. M. *et al.* Gemcitabine/nab-Paclitaxel versus FOLFIRINOX for palliative first-  
36 line treatment of advanced pancreatic cancer: A propensity score analysis. *European*  
37 *Journal of Cancer* **151**, 3-13 (2021).
- 38 33 Haas, M. *et al.* Extended RAS analysis and correlation with overall survival in  
39 advanced pancreatic cancer. *British journal of cancer* **116**, 1462 (2017).
- 40 34 Heinemann, V. *et al.* Gemcitabine plus erlotinib followed by capecitabine versus  
41 capecitabine plus erlotinib followed by gemcitabine in advanced pancreatic cancer:  
42 final results of a randomised phase 3 trial of the 'Arbeitsgemeinschaft Internistische  
43 Onkologie'(AIO-PK0104). *Gut* **62**, 751-759 (2013).

44

#### 45 **Figure legends and table titles**

#### 46 **Figure 1**

47 *Differential expression of KRT81, HNF1A and GATA6 in pancreatic cancer*

48 Immunohistochemical detection of *KRT81, HNF1A and GATA6* expression in exemplary  
49 PDAC samples. 200-fold magnification. Scale bar indicates 50 µm (A). Comparison of the  
50 tumors' transcriptional subtypes based on the expression of *KRT81 / HNF1A* or *GATA6* in  
51 advanced (B) and resected PDAC (C) as well as between the primary tumor and its

1 corresponding metastasis using subtyping based on KRT81 / HNF1A-expression (D) or  
2 GATA6-expression (E).

3

#### 4 **Figure 2**

5 *Transcriptional subtypes are associated with therapy response in 1<sup>st</sup> line gemcitabine treated*  
6 *advanced pancreatic cancer patients*

7 Univariate analyses (Kaplan–Meier curves and log-rank tests) for PFS and OS in the  
8 subtypes based on KRT81 / HNF1A - expression stratified by 1<sup>st</sup> line chemotherapy (A, B) as  
9 well as in the subtypes based on GATA6 - expression stratified by 1<sup>st</sup> line chemotherapy (C,  
10 D). Crossed lines indicate censored cases.

11

#### 12 **Figure 3**

13 *Transcriptional subtypes are associated with therapy response in resected pancreatic cancer*  
14 *patients treated with adjuvant gemcitabine-based chemotherapy*

15 Univariate analyses (Kaplan–Meier curves and log-rank tests) for DFS and OS in the  
16 subtypes based on KRT81 / HNF1A - expression stratified by gemcitabine-based adjuvant  
17 treatment (A, B) and in the subtypes based on GATA6 - expression stratified by gemcitabine-  
18 based adjuvant treatment (C, D). Crossed lines indicate censored cases.

19

20

#### 21 **Table titles**

##### 22 **Table 1**

23 Clinicopathological patient characteristics according to KRT81 / HNF1A - expression and  
24 GATA6 - expression in the aPDAC cohort.

25

##### 26 **Table 2**

27 Clinicopathological patient characteristics according to KRT81 / HNF1A - expression and  
28 GATA6 - expression in the rPDAC cohort.

29

##### 30 **Table 3**

31 Study overview on transcriptional subtyping in PDAC

32

33

#### 34 **Supplemental figure legends**

##### 35 **Figure S1**

36 *Expression of KRT81, HNF1A and GATA6 in non-neoplastic tissues*

1 KRT81 expression in normal human tonsil (A), HNF1A expression in normal human small  
2 bowel mucosa (B) and GATA6 expression in normal human non-neoplastic pancreatic ducts  
3 (C). 200-fold magnification. Scale bars indicate 50  $\mu$ m.

4  
5 **Figure S2**

6 *Transcriptional subtypes are associated with prognosis in advanced pancreatic cancer*  
7 *patients*

8 Univariate analyses (Kaplan–Meier curves and log-rank tests) for PFS and OS in the  
9 subtypes based on KRT81 / HNF1A expression (A, B) as well as in the subtypes based on  
10 GATA6 expression (C, D). Crossed lines indicate censored cases.

11  
12 **Figure S2**

13 *Predominance of the transcriptional subtype affects prognosis in resected pancreatic cancer*  
14 *patients*

15 Univariate analyses (Kaplan–Meier curves and log-rank tests) for OS and DFS in the  
16 subtypes based on KRT81 and HNF1A (a, b)

17  
18 **Figure S3**

19 *Transcriptional subtypes are associated with prognosis in resected pancreatic cancer*  
20 *patients*

21 Univariate analyses (Kaplan–Meier curves and log-rank tests) for PFS and OS in the  
22 subtypes based on KRT81 / HNF1A expression (A, B) as well as in the subtypes based on  
23 GATA6 expression (C, D). Crossed lines indicate censored cases.

24  
25 **Figure S4**

26 *Transcriptional subtype is associated with therapy response in resected pancreatic cancer*  
27 *patients treated with adjuvant gemcitabine-based chemotherapy*

28 Univariate analyses (Kaplan–Meier curves and log-rank tests) for DFS and OS stratified by  
29 gemcitabine-based adjuvant treatment of the subtypes based on KRT81 / HNF1A -  
30 expression and GATA6 - expression in the TCGA-PAAD cohort (A-D) and in the PACA-CA  
31 cohort (E-H). Crossed lines indicate censored cases.

32  
33 **Figure S5**

34 *Transcriptional subtypes show differential expression of gemcitabine-resistance promoting*  
35 *genes*

36 Spearman correlations (scatter plots) of log<sub>2</sub> mRNA expression between GATA6, HNF1A  
37 and KRT81 with ABCC3 or MVP across the TCGA-PAAD firehose dataset (A - F) as well as

1 the ICGC-CA firehose dataset (G - L, \*P < 0.05; \*\*P < 0.01,\*\*\*P < 0.0001; n.s., not  
2 significant; Spearman (two-tailed)).

3

4 **Figure S6**

5 *KRT81 / HNF1A- or GATA6-based transcriptional subtypes are not associated with specific*  
6 *molecular alterations in pancreatic cancer*

7 Oncoprint for the ten most common genetic alterations in the subtypes based on KRT81 /  
8 HNF1A - expression (A) and GATA6 - expression (B).

9

10

11 **Supplemental table titles**

12

13 **Table S1**

14 Prognostic impact of the predominant transcriptional subtype in advanced and resected  
15 PDAC patients.

16

17 **Table S2**

18 Comparison of both subtyping systems in the advanced and the resected PDAC cohorts.

19

20 **Table S3**

21 Assessment of transcriptional subtypes in different tissue samples for KRT81 / HNF1A (A)  
22 and GATA6 (B).

23

24 **Table S4**

25 Subtype changes during disease progression.

26

27 **Table S5**

28 Comparison of primary tumor subtype with metastatic occurrence and subtype changes for  
29 KRT81 / HNF1A and GATA6.

30

31 **Table S6**

32 Transcriptional subtypes in primary tumors and corresponding metastasis.

33

34 **Table S7**

35 Metastatic localization, primary tumor subtype and occurrence of subtype change.

36

37 **Table S8**

1 Multivariate Cox regression analysis of PFS- and OS-associated factors in the advanced  
2 pancreatic cancer study cohort.

3

4 **Table S9**

5 Multivariate Cox regression analysis of PFS- and OS-associated factors in the aPDAC cohort  
6 stratified for subtypes.

7

8 **Table S10**

9 Multivariate Cox regression analysis of DFS- and OS-associated factors in the resected  
10 PDAC cohort.

11

12 **Table S11**

13 Five-year survival rates in the rPDAC cohort for subtypes based on KRT81 / HNF1A- and  
14 GATA6- expression according to adjuvant gemcitabine treatment.

15

16 **Table S12**

17 Multivariate Cox regression analysis of DFS- and OS-associated factors in the rPDAC cohort  
18 stratified for transcriptional subtypes.

**Figure 1**

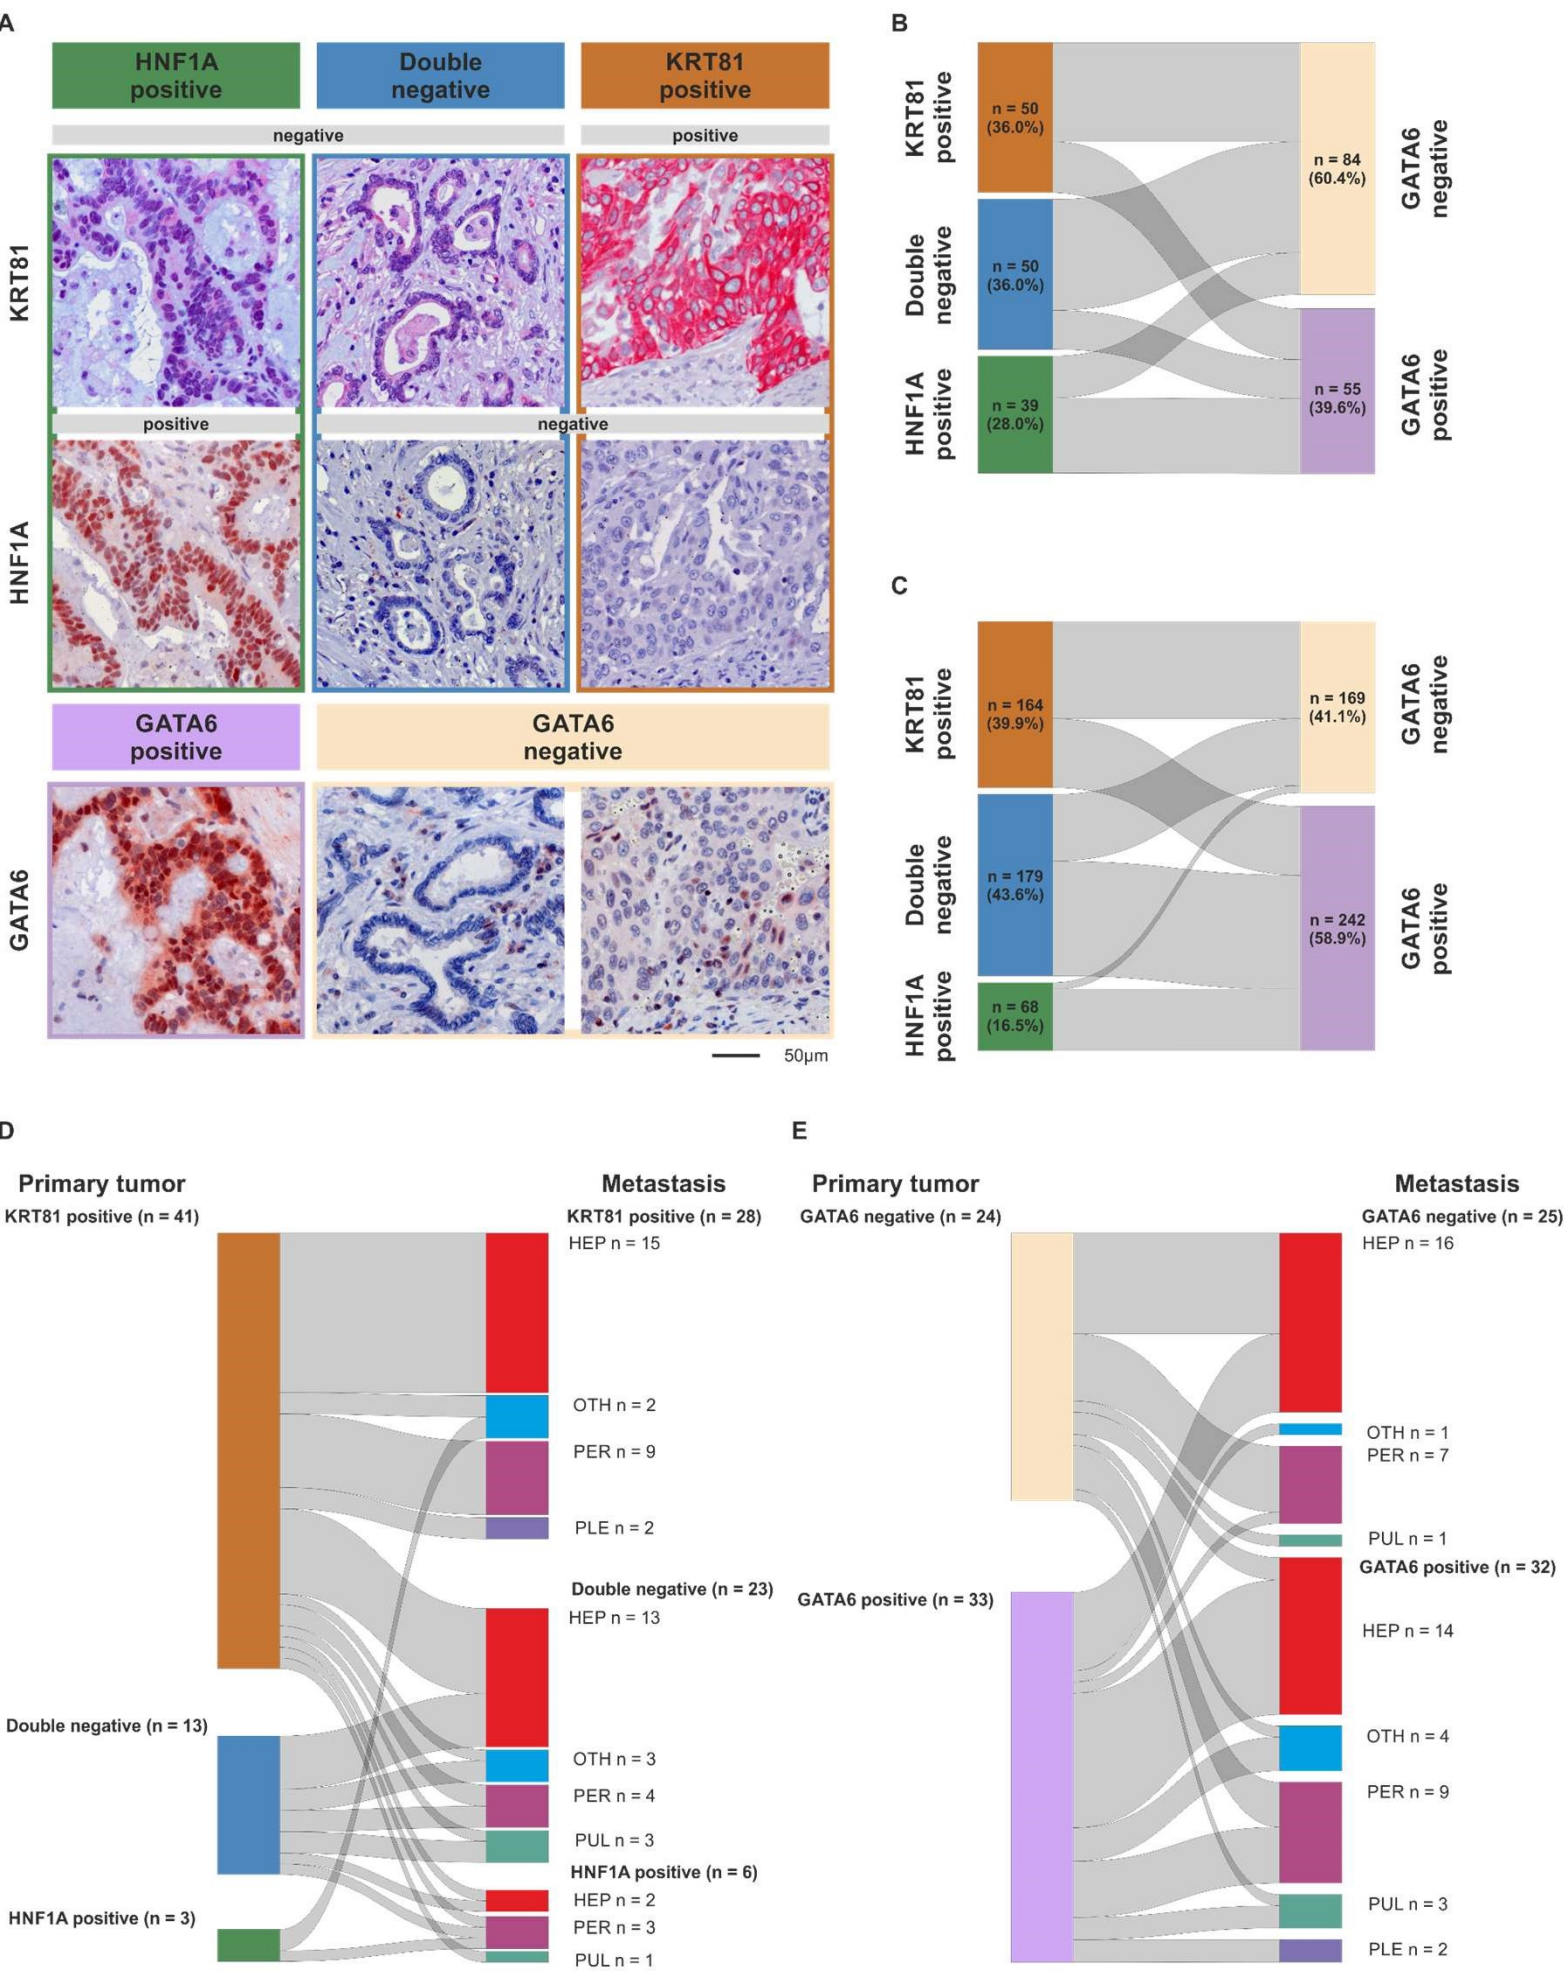



**Figure 2**

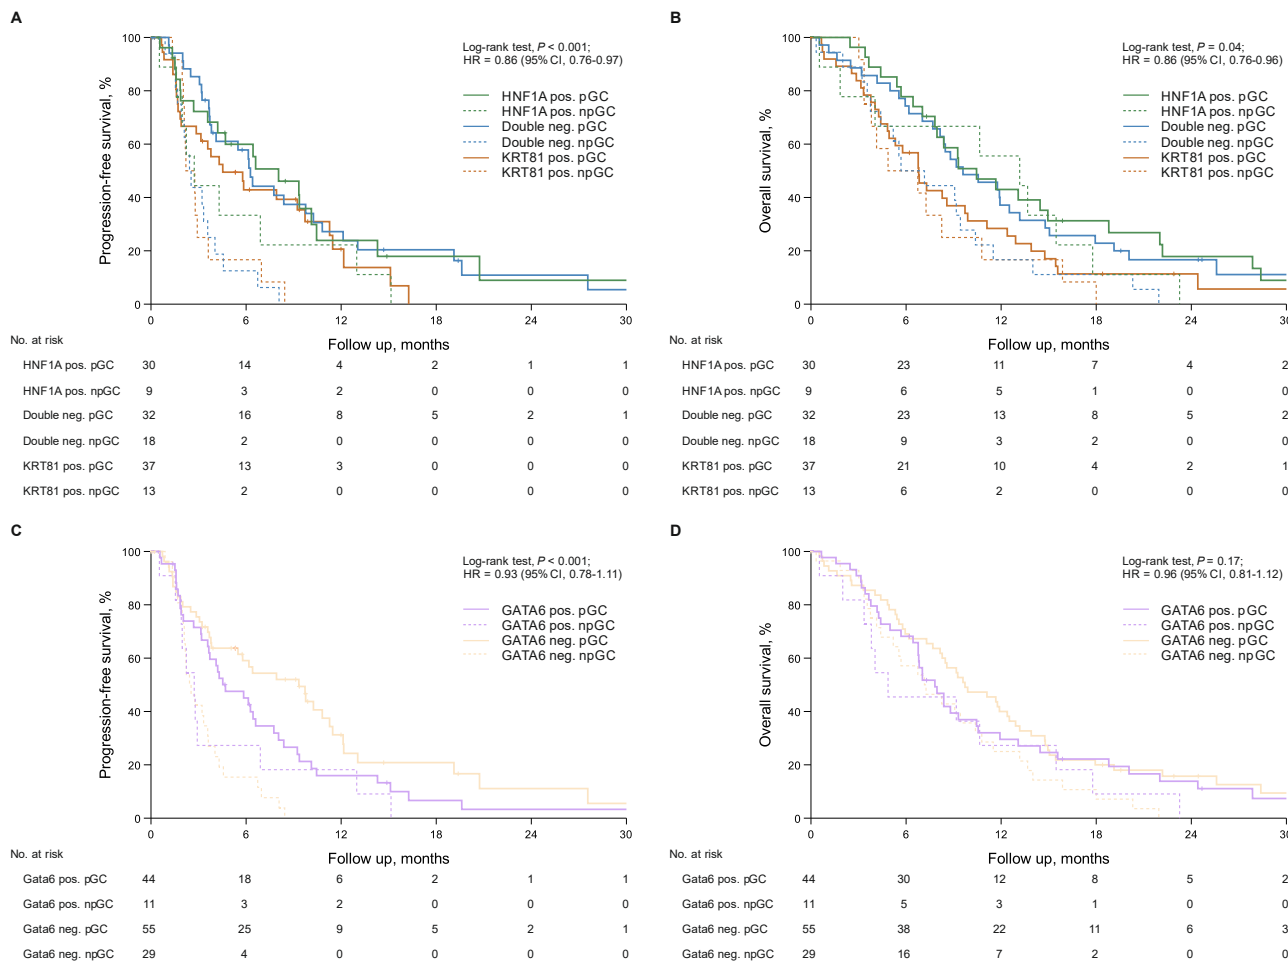

**Figure 3**

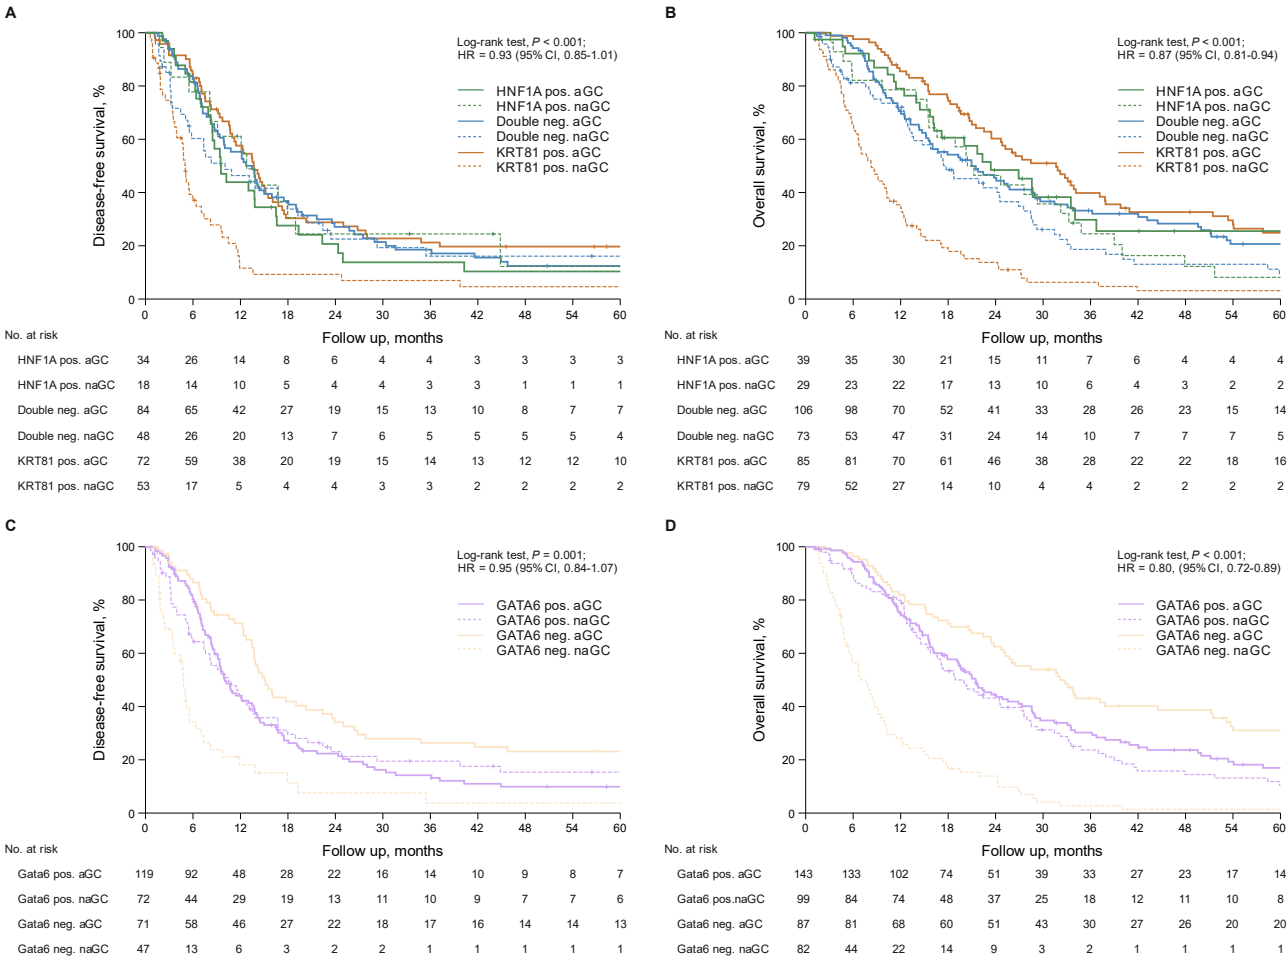

**Table 1**

Patients clinicopathological variables and transcriptional subtypes in the aPDAC cohort.

|                        | subtype, no (%)     |                      |                     | p-value ( $\chi^2$ -test) | subtype, no (%)     |                     |                           |
|------------------------|---------------------|----------------------|---------------------|---------------------------|---------------------|---------------------|---------------------------|
|                        | KRT81 pos. (n = 50) | double neg. (n = 50) | HNF1A pos. (n = 39) |                           | GATA6 neg. (n = 84) | GATA6 pos. (n = 55) | p-value ( $\chi^2$ -test) |
| sex                    |                     |                      |                     |                           |                     |                     |                           |
| female                 | 30 (60.0)           | 29 (58.0)            | 20 (51.3)           | 0.70                      | 38 (45.2)           | 22 (40.0)           | 0.54                      |
| male                   | 20 (40.0)           | 21 (42.0)            | 19 (48.7)           |                           | 46 (54.8)           | 33 (60.0)           |                           |
| age group              |                     |                      |                     |                           |                     |                     |                           |
| ≤ 60                   | 20 (40.0)           | 19 (38.0)            | 18 (46.2)           | 0.73                      | 33 (39.3)           | 24 (43.6)           | 0.61                      |
| > 60                   | 30 (60.0)           | 31 (62.0)            | 21 (53.8)           |                           | 51 (60.7)           | 31 (56.4)           |                           |
| treatment arm          |                     |                      |                     |                           |                     |                     |                           |
| non-gemcitabine based  | 13 (26.0)           | 18 (36.0)            | 9 (23.1)            | 0.35                      | 29 (34.5)           | 11 (20.0)           | 0.06                      |
| gemcitabine based      | 37 (74.0)           | 32 (64.0)            | 30 (76.9)           |                           | 55 (65.5)           | 44 (80.0)           |                           |
| KPS                    |                     |                      |                     |                           |                     |                     |                           |
| ≤ 80                   | 18 (36.0)           | 19 (38.8)            | 14 (35.9)           | 0.95                      | 32 (38.1)           | 19 (35.2)           | 0.73                      |
| > 80                   | 32 (64.0)           | 30 (61.2)            | 25 (64.1)           |                           | 52 (61.9)           | 35 (64.8)           |                           |
| grade group            |                     |                      |                     |                           |                     |                     |                           |
| G1-G2                  | 17 (34.0)           | 23 (46.0)            | 21 (53.8)           | 0.16                      | 33 (39.3)           | 28 (50.9)           | 0.18                      |
| G3-G4                  | 33 (66.0)           | 27 (54.0)            | 18 (46.2)           |                           | 51 (60.7)           | 27 (49.1)           |                           |
| stage at therapy start |                     |                      |                     |                           |                     |                     |                           |
| locally advanced       | 9 (18.0)            | 8 (16.0)             | 7 (17.9)            | 0.96                      | 15 (17.9)           | 9 (16.4)            | 0.82                      |
| metastatic             | 41 (82.0)           | 42 (84.0)            | 32 (82.1)           |                           | 69 (82.1)           | 46 (83.6)           |                           |

**Table 2**

Patients clinicopathological variables and transcriptional subtypes in the rPDAC cohort.

|                       | subtype, no (%)        |                         |                       | P value ( $\chi^2$ ) | subtype, no (%)   |                    | P value ( $\chi^2$ ) |
|-----------------------|------------------------|-------------------------|-----------------------|----------------------|-------------------|--------------------|----------------------|
|                       | KRT81-positive (n=164) | Double-negative (n=179) | HNF1A-positive (n=68) |                      | GATA6 neg.(n=169) | GATA6 pos. (n=242) |                      |
| sex                   |                        |                         |                       |                      |                   |                    |                      |
| female                | 72 (43.9)              | 99 (55.3)               | 29 (42.6)             | 0.06                 | 72 (42.6)         | 128 (52.9)         | 0.04                 |
| male                  | 92 (56.1)              | 80 (44.7)               | 39 (57.4)             |                      | 97 (57.4)         | 114 (47.1)         |                      |
| age group             |                        |                         |                       |                      |                   |                    |                      |
| ≤ 68                  | 91 (55.5)              | 93 (52.0)               | 29 (42.6)             | 0.20                 | 73 (43.2)         | 125 (51.7)         | 0.09                 |
| > 68                  | 73 (44.5)              | 86 (48.0)               | 39 (57.4)             |                      | 96 (56.8)         | 117 (48.3)         |                      |
| treatment arm, no (%) |                        |                         |                       |                      |                   |                    |                      |
| non-gemcitabinebased  | 79 (48.2)              | 73 (40.8)               | 29 (42.6)             | 0.38                 | 82 (48.5)         | 99 (40.9)          | 0.13                 |
| gemcitabinebased      | 85 (51.8)              | 106 (59.2)              | 39 (57.4)             |                      | 87 (51.5)         | 143 (59.1)         |                      |
| UICC stage (2017)     |                        |                         |                       |                      |                   |                    |                      |
| stage IA              | 6 (3.7)                | 12 (6.7)                | 6 (8.8)               | 0.37                 | 8 (4.7)           | 16 (6.6)           | 0.92                 |
| stage IB              | 33 (20.1)              | 32 (17.9)               | 16 (23.5)             |                      | 33 (19.5)         | 48 (19.8)          |                      |
| stage IIA             | 16 (9.8)               | 14 (7.8)                | 5 (7.4)               |                      | 16 (9.5)          | 19 (7.9)           |                      |
| stage IIB             | 64 (39.0)              | 54 (30.2)               | 18 (26.5)             |                      | 56 (33.1)         | 80 (33.1)          |                      |
| stage III             | 25 (15.2)              | 41 (22.9)               | 16 (23.5)             |                      | 32 (18.9)         | 50 (20.7)          |                      |
| stage IV              | 20 (12.2)              | 26 (14.5)               | 7 (10.3)              |                      | 24 (14.2)         | 29 (12.0)          |                      |
| pT (2017)             |                        |                         |                       |                      |                   |                    |                      |
| pT1a                  | 1 (0.6)                | 0 (0.0)                 | 2 (2.9)               | 0.06                 | 0 (0.0)           | 3 (1.2)            | 0.36                 |
| pT1b                  | 1 (0.6)                | 4 (2.2)                 | 0 (0.0)               |                      | 2 (1.2)           | 3 (1.2)            |                      |
| pT1c                  | 11 (6.7)               | 26 (14.5)               | 8 (11.8)              |                      | 14 (8.3)          | 31 (12.8)          |                      |
| pT2                   | 104 (63.4)             | 99 (55.3)               | 40 (58.8)             |                      | 106 (62.7)        | 137 (56.6)         |                      |
| pT3                   | 46 (28.0)              | 46 (25.7)               | 18 (26.5)             |                      | 46 (27.2)         | 64 (26.4)          |                      |
| pT4                   | 1 (0.6)                | 4 (2.2)                 | 0 (0.0)               |                      | 1 (0.6)           | 4 (1.7)            |                      |
| pN (2017)             |                        |                         |                       |                      |                   |                    |                      |
| pN0                   | 62 (37.8)              | 71 (39.7)               | 31 (45.6)             | 0.18                 | 69 (40.8)         | 95 (39.3)          | 0.88                 |
| pN1                   | 68 (41.5)              | 62 (34.6)               | 17 (25.0)             |                      | 61 (36.1)         | 86 (35.5)          |                      |
| pN2                   | 34 (20.7)              | 46 (25.7)               | 20 (29.4)             |                      | 39 (23.1)         | 61 (25.2)          |                      |
| R-status              |                        |                         |                       |                      |                   |                    |                      |
| 0                     | 106 (64.6)             | 121 (67.7)              | 48 (70.6)             | 0.66                 | 108 (63.9)        | 167 (69.0)         | 0.28                 |
| 1                     | 58 (35.4)              | 58 (32.4)               | 20 (29.4)             |                      | 61 (36.1)         | 75 (31.0)          |                      |
| grade group           |                        |                         |                       |                      |                   |                    |                      |
| G1-G2                 | 45 (27.4)              | 53 (29.6)               | 23 (33.8)             | 0.62                 | 51 (30.2)         | 70 (28.9)          | 0.78                 |
| G3-G4                 | 119 (72.6)             | 126 (70.4)              | 45 (66.2)             |                      | 118 (69.8)        | 172 (71.1)         |                      |

**Table 3**

**Study overview on transcriptional subtyping in PDAC**

| marker | author        | year | cohort | clinical situation | n#                                                                                       | TNM version | detection method | antibodies, dilution                                                                                                                                                                                                        | issue type                                                                                                                                                                                                            | scoring method                          | cutoff definition                                                                                                                                        | results                                                                                                                                                                                                                                                                                | cohort stratification based on therapy                                                         | clinical relevance/conclusion                                                                                                                                                                                                                                                                                     |                                                      |          |                                       |     |                                                                                                                                                                                                                             |                                                                         |                                                                                                                                                    |                                                                                                                                                                                                 |
|--------|---------------|------|--------|--------------------|------------------------------------------------------------------------------------------|-------------|------------------|-----------------------------------------------------------------------------------------------------------------------------------------------------------------------------------------------------------------------------|-----------------------------------------------------------------------------------------------------------------------------------------------------------------------------------------------------------------------|-----------------------------------------|----------------------------------------------------------------------------------------------------------------------------------------------------------|----------------------------------------------------------------------------------------------------------------------------------------------------------------------------------------------------------------------------------------------------------------------------------------|------------------------------------------------------------------------------------------------|-------------------------------------------------------------------------------------------------------------------------------------------------------------------------------------------------------------------------------------------------------------------------------------------------------------------|------------------------------------------------------|----------|---------------------------------------|-----|-----------------------------------------------------------------------------------------------------------------------------------------------------------------------------------------------------------------------------|-------------------------------------------------------------------------|----------------------------------------------------------------------------------------------------------------------------------------------------|-------------------------------------------------------------------------------------------------------------------------------------------------------------------------------------------------|
| GATA6  | Martinielli   | 2017 | 1      | resected           | 313                                                                                      | 7th         | IHC              | polyclonal goat anti-GATA6 antibody (catalog no. AF1700, R&D Systems) dilution 1:1000                                                                                                                                       | TMA                                                                                                                                                                                                                   | high, medium, low                       | NR                                                                                                                                                       | GATA6 high: 155 (49%)<br>GATA6 medium: 121 (39%)<br>GATA6 low: 37 (12%)                                                                                                                                                                                                                | 5FU / leucovorin vs. gemcitabine                                                               | borderline predictive for 5FU / leucovorin, not for gemcitabine correlates with tumor differentiation.                                                                                                                                                                                                            |                                                      |          |                                       |     |                                                                                                                                                                                                                             |                                                                         |                                                                                                                                                    |                                                                                                                                                                                                 |
|        |               |      |        |                    |                                                                                          |             |                  |                                                                                                                                                                                                                             |                                                                                                                                                                                                                       |                                         |                                                                                                                                                          | score 1: weak nuclear staining in at least 5% tumor cells<br>score 2: moderate nuclear staining in the tumor<br>score 3: strong nuclear immunopositivity<br>score 4: very strong and diffuse staining                                                                                  |                                                                                                |                                                                                                                                                                                                                                                                                                                   | GATA6 High: 78 (74%)                                 | NR       | prognostic<br>IHC correlates with ISH |     |                                                                                                                                                                                                                             |                                                                         |                                                                                                                                                    |                                                                                                                                                                                                 |
|        | O'Kane        | 2021 | 1      | advanced stage     | 106                                                                                      | NA          | ISH, IHC         | polyclonal goat anti-GATA6 antibody (catalog no. AF1700, R&D Systems) dilution 1:1000                                                                                                                                       | resections, biopsies                                                                                                                                                                                                  | semiquantitative score (1-4)            | low; semiquantitative score 1-2<br>high; semiquantitative score 3-4                                                                                      | GATA6 High: 73 (56%)                                                                                                                                                                                                                                                                   | modified FOLFIRINOX vs. gemcitabine+ nab-paclitaxel. 10 patients did not receive any treatment | predictive for mFOLFIRINOX but not for gemcitabine/nab-paclitaxel<br>digital assessment may improve scoring.                                                                                                                                                                                                      |                                                      |          |                                       |     |                                                                                                                                                                                                                             |                                                                         |                                                                                                                                                    |                                                                                                                                                                                                 |
|        | Duan          | 2021 | 1      | advanced stage     | 130<br>(106 patients already reported by O'Kane et al.)                                  | NA          | IHC              | polyclonal goat anti-GATA6 antibody (catalog no. AF1700, R&D Systems) dilution 1:1000                                                                                                                                       | biopsies, whole mount                                                                                                                                                                                                 | low / high                              | low; semiquantitative score 1-2<br>high; semiquantitative score 3-4                                                                                      | GATA6 High: 380 (51%)                                                                                                                                                                                                                                                                  | NR                                                                                             | prognostic                                                                                                                                                                                                                                                                                                        |                                                      |          |                                       |     |                                                                                                                                                                                                                             |                                                                         |                                                                                                                                                    |                                                                                                                                                                                                 |
|        | de Andrés     | 2021 | 1      | resected           | 745<br>(292 patients from the ESPAC-3 trial already reported by Martinielli et al. 2017) | 7th         | IHC              | polyclonal goat anti-GATA6 antibody (R&D systems, AF1700, 0.2ug/mL) dilution NR                                                                                                                                             | TMA                                                                                                                                                                                                                   | low / high                              | histoscore quantification (proportion of positive tumor cells multiplied by intensity from 0 to 3)<br>low: Histoscore < 150<br>high: Histoscore ≥ 150    | GATA6 high tissue: 18 (86.7%)<br>GATA6 high PDO: 19 (76.0%)                                                                                                                                                                                                                            | NR                                                                                             | not prognostic (PFS)<br>differential expression between tissue and PDO in 4/21 (19%).                                                                                                                                                                                                                             |                                                      |          |                                       |     |                                                                                                                                                                                                                             |                                                                         |                                                                                                                                                    |                                                                                                                                                                                                 |
|        | Beutel        | 2021 | 1      | advanced stage     | 25 PDO and 21 corresponding tissue from liver metastases                                 | NA          | IHC              | monoclonal rabbit anti-GATA6 antibody (clone D61E4, Cell Signaling Technology) dilution 1:100                                                                                                                               | PDO's, biopsies                                                                                                                                                                                                       | NR                                      | NR                                                                                                                                                       | GATA6 high: 36 (47.3%)                                                                                                                                                                                                                                                                 | adjunct treatment vs. no adjunct treatment                                                     | predictive for adjunct therapy                                                                                                                                                                                                                                                                                    |                                                      |          |                                       |     |                                                                                                                                                                                                                             |                                                                         |                                                                                                                                                    |                                                                                                                                                                                                 |
|        | Shoucair      | 2022 | 1      | resected           | 76                                                                                       | NR          | IHC              | NR                                                                                                                                                                                                                          | NR                                                                                                                                                                                                                    | low/high                                | NR                                                                                                                                                       | GATA6 high: 169 (41.1%)                                                                                                                                                                                                                                                                | gemcitabine-based vs. non gemcitabine-based                                                    | prognostic (DFS)<br>correlates with CA19-9 levels<br>influences the role of clinicopathological variables such as R-status<br>Parth and tumor tissue comparable<br>no relevant associations to clinicopathological variables<br>prognostic in resected PDAC<br>predictive for gemcitabine-based adjunct treatment |                                                      |          |                                       |     |                                                                                                                                                                                                                             |                                                                         |                                                                                                                                                    |                                                                                                                                                                                                 |
|        | Heredia-Soto  | 2023 | 1      | resected           | 89                                                                                       | 7th         | IHC              | polyclonal goat anti-GATA6 antibody (catalog no. AF1700, R&D Systems) dilution NR                                                                                                                                           | TMA                                                                                                                                                                                                                   | low/high                                | histoscore quantification (proportion of positive tumor cells multiplied by intensity from 0 to 3)<br>low: Histoscore < 30<br>high: Histoscore ≥ 30      | GATA6 high: 72 (81%)                                                                                                                                                                                                                                                                   | only adjunct gemcitabine treated patients included                                             | not prognostic. Predictive for gemcitabine-based palliative treatment<br>no associations to clinicopathological variables.<br>may change during metastatic progression.                                                                                                                                           |                                                      |          |                                       |     |                                                                                                                                                                                                                             |                                                                         |                                                                                                                                                    |                                                                                                                                                                                                 |
|        | Quentner      | 2024 | 1      | resected           | 411                                                                                      | 8th         | IHC              | polyclonal rabbit anti-GATA6 antibody (PA1-104, Thermo Fisher, Germering, Germany) dilution 1:200                                                                                                                           | TMA                                                                                                                                                                                                                   | negative / positive                     | tumors with distinct nuclear staining were considered GATA6 positive                                                                                     | GATA6 positive 169 (41.1%)                                                                                                                                                                                                                                                             | gemcitabine-based vs. non gemcitabine-based                                                    | prognostic in resected PDAC<br>predictive for gemcitabine-based adjunct treatment<br>influences the role of clinicopathological variables such as R-status                                                                                                                                                        |                                                      |          |                                       |     |                                                                                                                                                                                                                             |                                                                         |                                                                                                                                                    |                                                                                                                                                                                                 |
| 2      |               |      |        |                    |                                                                                          |             |                  |                                                                                                                                                                                                                             |                                                                                                                                                                                                                       |                                         |                                                                                                                                                          |                                                                                                                                                                                                                                                                                        |                                                                                                |                                                                                                                                                                                                                                                                                                                   | advanced stage                                       | 139      | NA                                    | TMA | GATA6 positive 55 (39.9%)                                                                                                                                                                                                   | gemcitabine-based vs. non gemcitabine-based                             | not prognostic. Predictive for gemcitabine-based palliative treatment<br>no associations to clinicopathological variables.                         |                                                                                                                                                                                                 |
| 3      |               |      |        |                    |                                                                                          |             |                  |                                                                                                                                                                                                                             |                                                                                                                                                                                                                       |                                         |                                                                                                                                                          |                                                                                                                                                                                                                                                                                        |                                                                                                |                                                                                                                                                                                                                                                                                                                   | resected                                             | 57       | 8th                                   | TMA | GATA6 positive 33 (57.9%)                                                                                                                                                                                                   | NA                                                                      | may change during metastatic progression.                                                                                                          |                                                                                                                                                                                                 |
| KRT81  | Park          | 2022 | 1      | resected           | 108                                                                                      | 8th         | IHC              | mouse monoclonal anti-keratin 81 antibody (catalog no. SC-100929, Santa Cruz Biotechnology Inc.) dilution 1:500                                                                                                             | TMA                                                                                                                                                                                                                   | negative / positive                     | "KRT81-positive": >30% KRT81 expressing tumor cells                                                                                                      | KRT81+: 30 (28%)<br>DP: NR<br>KRT81+: 24 (4.4%)<br>NA: 18 (33%)                                                                                                                                                                                                                        | NR                                                                                             | prognostic<br>correlates with reduced gland formation<br>associated with remaining residual tumor<br>prognostic                                                                                                                                                                                                   |                                                      |          |                                       |     |                                                                                                                                                                                                                             |                                                                         |                                                                                                                                                    |                                                                                                                                                                                                 |
|        |               |      |        |                    |                                                                                          |             |                  |                                                                                                                                                                                                                             |                                                                                                                                                                                                                       |                                         |                                                                                                                                                          |                                                                                                                                                                                                                                                                                        |                                                                                                |                                                                                                                                                                                                                                                                                                                   | 2                                                    | resected | 68                                    | 8th | TMA                                                                                                                                                                                                                         | HNF1A low: 70 (55%)<br>HNF1A moderate: 37 (29%)<br>HNF1A high: 21 (16%) | NA                                                                                                                                                 | predictive for gemcitabine, correlates with stage and Pn1                                                                                                                                       |
|        |               |      |        |                    |                                                                                          |             |                  |                                                                                                                                                                                                                             |                                                                                                                                                                                                                       |                                         |                                                                                                                                                          |                                                                                                                                                                                                                                                                                        |                                                                                                |                                                                                                                                                                                                                                                                                                                   | 3                                                    | resected | 55                                    | 8th | IHC                                                                                                                                                                                                                         | HNF1A+: 35 (32%)<br>DP: NR                                              | NR                                                                                                                                                 | not prognostic<br>correlates with increased gland formation<br>not associated with remaining residual tumor                                                                                     |
|        | Lu            | 2019 | 1      | resected           | 128                                                                                      | 8th         | IHC              | rabbit anti-HNF1A antibody (catalog no. ab96777, Abcam) dilution 1:200                                                                                                                                                      | NR                                                                                                                                                                                                                    | semiquantitative score according to IBS | low: 0-2<br>moderate: 3-6<br>high: 8-12                                                                                                                  | HNF1A low: 70 (55%)<br>HNF1A moderate: 37 (29%)<br>HNF1A high: 21 (16%)                                                                                                                                                                                                                | NA                                                                                             | predictive for gemcitabine, correlates with stage and Pn1                                                                                                                                                                                                                                                         |                                                      |          |                                       |     |                                                                                                                                                                                                                             |                                                                         |                                                                                                                                                    |                                                                                                                                                                                                 |
|        | Park          | 2022 | 2      | resected           | 68                                                                                       | 8th         | IHC              | anti-HNF1A antibody (catalog no. ab96777, Abcam), dilution 1:500                                                                                                                                                            | TMA                                                                                                                                                                                                                   | negative / positive                     | "HNF1A-positive": nuclear expression, any intensity, moderate or strong intensity, ≥ 5% of cells                                                         | NR                                                                                                                                                                                                                                                                                     | NR                                                                                             | NR                                                                                                                                                                                                                                                                                                                |                                                      |          |                                       |     |                                                                                                                                                                                                                             |                                                                         |                                                                                                                                                    |                                                                                                                                                                                                 |
| 3      |               |      |        |                    |                                                                                          |             |                  |                                                                                                                                                                                                                             |                                                                                                                                                                                                                       |                                         |                                                                                                                                                          |                                                                                                                                                                                                                                                                                        |                                                                                                |                                                                                                                                                                                                                                                                                                                   | resected                                             | 55       | 8th                                   | TMA | NR                                                                                                                                                                                                                          | NR                                                                      | NR                                                                                                                                                 |                                                                                                                                                                                                 |
| 3      |               |      |        |                    |                                                                                          |             |                  |                                                                                                                                                                                                                             |                                                                                                                                                                                                                       |                                         |                                                                                                                                                          |                                                                                                                                                                                                                                                                                        |                                                                                                |                                                                                                                                                                                                                                                                                                                   | resected                                             | 55       | 8th                                   | TMA | NR                                                                                                                                                                                                                          | NR                                                                      | NR                                                                                                                                                 |                                                                                                                                                                                                 |
|        | HNF1a + KRT81 | Noll | 2016   | 1                  | resected                                                                                 | 231         | 7th              | IHC                                                                                                                                                                                                                         | mouse monoclonal anti-keratin 81 antibody (catalog no. sc-100929, Santa Cruz Biotechnology Inc.) dilution NR<br>rabbit polyclonal anti-HNF1A antibody (catalog no. sc-8986, Santa Cruz Biotechnology Inc) dilution NR | TMA                                     | negative / positive                                                                                                                                      | "KRT81-positive": detectable staining regardless of signal strength / number of positive cells, strong expression, >10% KRT81 expressing tumor cells<br>"HNF1A-positive": detectable staining regardless of signal strength / number of positive cells, double positive cases excluded | DN: 92 (40%)<br>KRT81+: 79 (34%)<br>HNF1A+: 46 (20%)<br>DP: 14 (6%)<br>DN: 165 (63%)           | NR                                                                                                                                                                                                                                                                                                                | prognostic (HNF1A / KRT81), correlates with grading. |          |                                       |     |                                                                                                                                                                                                                             |                                                                         |                                                                                                                                                    |                                                                                                                                                                                                 |
| 1      |               |      |        |                    |                                                                                          |             |                  |                                                                                                                                                                                                                             |                                                                                                                                                                                                                       |                                         |                                                                                                                                                          |                                                                                                                                                                                                                                                                                        |                                                                                                |                                                                                                                                                                                                                                                                                                                   |                                                      | resected | 262                                   | 7th | TMA                                                                                                                                                                                                                         | negative / positive                                                     | "KRT81-positive": >30% KRT81 expressing tumor cells<br>"HNF1A-positive": medium to strong nuclear staining of HNF1A double positive cases excluded | KRT81+: 59 (23%)<br>HNF1A+: 35 (13%)<br>DP: 3 (1%)<br>DN: 41 (32%)<br>KRT81+: 21 (16%)<br>HNF1A+: 50 (39%)<br>DP: 18 (13%)<br>DN: 62 (50%)<br>KRT81+: 11 (9%)<br>HNF1A+: 47 (38%)<br>DP: 5 (3%) |
|        | Muckenhuber   | 2018 | 1      | resected           | 130                                                                                      | 7th         | IHC              | mouse monoclonal anti-keratin 81 antibody (catalog no. sc-100929, Santa Cruz Biotechnology Inc.) dilution 1:500<br>rabbit polyclonal anti-HNF1A antibody (catalog no. sc-8986, Santa Cruz Biotechnology Inc) dilution 1:100 | TMA                                                                                                                                                                                                                   | NR                                      | NR                                                                                                                                                       | NR                                                                                                                                                                                                                                                                                     | adjunct treatment vs. no adjunct treatment                                                     | prognostic (HNF1A / KRT81)<br>no correlation to clinicopathological variables                                                                                                                                                                                                                                     |                                                      |          |                                       |     |                                                                                                                                                                                                                             |                                                                         |                                                                                                                                                    |                                                                                                                                                                                                 |
| 1      |               |      |        |                    |                                                                                          |             |                  |                                                                                                                                                                                                                             |                                                                                                                                                                                                                       |                                         |                                                                                                                                                          |                                                                                                                                                                                                                                                                                        |                                                                                                |                                                                                                                                                                                                                                                                                                                   | advanced stage                                       | 125      | NA                                    | TMA | NR                                                                                                                                                                                                                          | NR                                                                      | gemcitabine-based vs. FOLFIRINOX-based                                                                                                             | prognostic (HNF1A / KRT81)<br>no correlation to clinicopathological variables<br>HNF1A+ increased initial tumor control in folfox-based treatment                                               |
|        | Kalissis      | 2019 | 1      | resected           | 55<br>(21 Patients derived from Muckenhuber et al.)                                      | 7th         | IHC              | according to Muckenhuber et al.                                                                                                                                                                                             | NR/TMA                                                                                                                                                                                                                | according Muckenhuber et al.            | according to Muckenhuber et al.<br>double negative and double positive cases were excluded                                                               | KRT81+: 16 (15.5%)<br>DN: NR<br>HNF1A+: 28 (51%)<br>DP: NR                                                                                                                                                                                                                             | FOLFIRINOX-based palliative treatment vs. gemcitabine-based palliative treatment               | prognostic<br>no correlation with clinicopathological variables<br>KRT81+ predictive for palliative FOLFIRINOX<br>KRT81+ predictive for palliative gemcitabine                                                                                                                                                    |                                                      |          |                                       |     |                                                                                                                                                                                                                             |                                                                         |                                                                                                                                                    |                                                                                                                                                                                                 |
|        | Kalissis      | 2020 | 1      | resected           | 103<br>(patients derived from Muckenhuber et al.)                                        | 7th         | IHC              | according to Muckenhuber et al.                                                                                                                                                                                             | NR/TMA                                                                                                                                                                                                                | according Muckenhuber et al.            | according to Muckenhuber et al.                                                                                                                          | NR                                                                                                                                                                                                                                                                                     | NR                                                                                             | prognostic                                                                                                                                                                                                                                                                                                        |                                                      |          |                                       |     |                                                                                                                                                                                                                             |                                                                         |                                                                                                                                                    |                                                                                                                                                                                                 |
|        | Kruger        | 2022 | 1      | resected           | 71                                                                                       | 7th         | IHC              | anti-KRT81, (clone 3B10-SB10, LS Bio, Seattle, WA) dilution 1:120<br>polyclonal rabbit anti-HNF1A (Atlas antibodies, Stockholm, Sweden) dilution 1:100                                                                      | resections                                                                                                                                                                                                            | negative / positive                     | "HNF1A-positive": strong and specific nuclear staining<br>"KRT81-positive": strong and specific membranous and cytoplasmic staining                      | M1-PUL: KRT81+: 11 (29%)<br>DN: 19 (50%)<br>HNF1A+: 8 (21%)<br>DP: 0 (0%)<br>M1-ANY: KRT81+: 8 (24%)<br>DN: 20 (61%)<br>HNF1A+: 5 (15%)<br>DP: 0 (0%)                                                                                                                                  | NR                                                                                             | no significant differences between isolated lung and other metastatic patterns                                                                                                                                                                                                                                    |                                                      |          |                                       |     |                                                                                                                                                                                                                             |                                                                         |                                                                                                                                                    |                                                                                                                                                                                                 |
| 1      |               |      |        |                    |                                                                                          |             |                  |                                                                                                                                                                                                                             |                                                                                                                                                                                                                       |                                         |                                                                                                                                                          |                                                                                                                                                                                                                                                                                        |                                                                                                |                                                                                                                                                                                                                                                                                                                   | resected                                             | 57       | not stat                              | IHC | mouse monoclonal anti-keratin 81 antibody (catalog no. sc-100929, Santa Cruz Biotechnology Inc.) dilution 1:200<br>mouse monoclonal anti-HNF1A antibody (catalog no. sc-39925, Santa Cruz Biotechnology Inc) dilution 1:200 | resections                                                              | negative / positive                                                                                                                                | NR                                                                                                                                                                                              |
|        | Quentner      | 2024 | 1      | resected           | 411                                                                                      | 8th         | IHC              | anti-KRT81, (clone 3B10-SB10, LS Bio, Seattle, WA) dilution 1:120<br>polyclonal rabbit anti-HNF1A (Atlas antibodies, Stockholm, Sweden) dilution 1:100                                                                      | TMA                                                                                                                                                                                                                   | negative / positive                     | samples with ≥ 30% KRT81+ or HNF1A-positive tumor cells: positive for each marker<br>double positive samples categorized according to predominant marker | KRT81+: 154 (37.5%)<br>HNF1A+: 49 (11.9%)<br>DP: 29 (7.0%)<br>DN: 173 (42.6%)                                                                                                                                                                                                          | gemcitabine-based vs. non gemcitabine-based                                                    | prognostic in PDAC (KRT81 / HNF1A)<br>no associations to clinicopathological variables<br>predictive for adjunct gemcitabine<br>influences clinicopathological risk factors such as R-status                                                                                                                      |                                                      |          |                                       |     |                                                                                                                                                                                                                             |                                                                         |                                                                                                                                                    |                                                                                                                                                                                                 |
| 2      |               |      |        |                    |                                                                                          |             |                  |                                                                                                                                                                                                                             |                                                                                                                                                                                                                       |                                         |                                                                                                                                                          |                                                                                                                                                                                                                                                                                        |                                                                                                |                                                                                                                                                                                                                                                                                                                   | advanced stage                                       | 139      | NA                                    | IHC | KRT81+: 38 (27.3%)<br>HNF1A+: 28 (20.1%)<br>DP: 23 (16.6%)<br>DN: 50 (36.0%)                                                                                                                                                | gemcitabine-based vs. non gemcitabine-based                             | not prognostic in PDAC<br>predictive for gemcitabine<br>no relevant associations to clinicopathological variables                                  |                                                                                                                                                                                                 |
| 3      |               |      |        |                    |                                                                                          |             |                  |                                                                                                                                                                                                                             |                                                                                                                                                                                                                       |                                         |                                                                                                                                                          |                                                                                                                                                                                                                                                                                        |                                                                                                |                                                                                                                                                                                                                                                                                                                   | resected                                             | 57       | 8th                                   | TMA | KRT81+: 39 (68.4%)<br>HNF1A+: 0 (0.0%)<br>DP: 5 (8.8%)<br>DN: 13 (22.8%)                                                                                                                                                    | NA                                                                      | subtype may change during metastasis<br>no association between changes in tumor differentiation and changes in subtype                             |                                                                                                                                                                                                 |
